# Supplementary material for: HTLV-2 Encoded Antisense Protein APH-2 Suppresses HIV-1 Replication
Source: MDPI journal article supplement (doi:10.3390/v13081432), 2021-07-23
Supplement: s1 [file s1]

## Supplementary Figure S1 : Schematic representation for generation of Mutants of APH-2

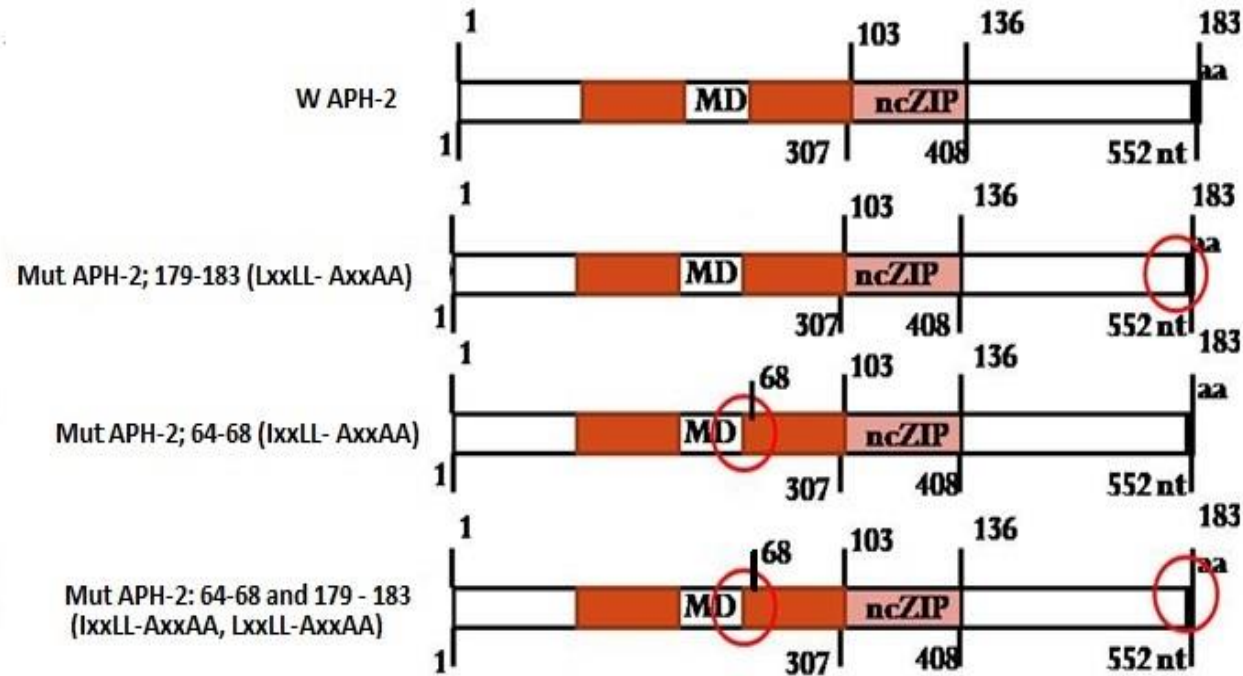

**Supplementary Figure S1 : Schematic representation for generation of Mutants of APH-2**, The HTLV-2 APH-2 was amplified from the HTLV-2 molecular clone pH6neo (gifted by Dr.P.G. Green, USA) and cloned in to the pCMV-HA expression vector to generate the wild type HA-APH-2. The mutant versions HA-APH-2\_LXXLL, amino acid (aa) 64-68 changed to aa AXXAA and HA-APH-2\_IXXLL aa 179-183 to aa AXXAA were generated by site directed mutagenesis.
